# Supplementary material for: Patient-Reported Outcomes and Total Health Care Expenditure in Prediction of Patient Satisfaction: Results From a National Study
Source: PubMed Central journal article supplement (PMC4869209; doi:10.2196/publichealth.4360), 2015-09-23
Supplement: publichealth_v1i2e13_app1.pdf [file publichealth_v1i2e13_app1.pdf]

| Variable ID  | Variable Name                   | % missing (based on 10,157 respondents) |
|--------------|---------------------------------|-----------------------------------------|
| 1. AGE2X     | AGE                             | 0.0                                     |
| 2. SEX       | GENDER                          | 0.0                                     |
| 3. RACEX     | RACE                            | 0.0                                     |
| 4. HISPANX   | HISPANIC ETHNICITY              | 0.0                                     |
| 5. MARRYY1X  | MARITAL STATUS                  | 0.0                                     |
| 6. HIBPDXY1  | HIGH BLOOD PRESSURE DIAG        | 0.1                                     |
| 7. CHDDXY1   | CORONARY HRT DISEASE DIAG       | 0.1                                     |
| 8. ANGIDXY1  | ANGINA DIAGNOSIS                | 0.1                                     |
| 9. STRKDXY1  | STROKE DIAGNOSIS                | 0.0                                     |
| 10. EMPHDXY1 | EMPHYSEMA DIAGNOSIS             | 0.0                                     |
| 11. CHOLDXY1 | HIGH CHOLESTEROL DIAGNOSIS      | 0.1                                     |
| 12. CANCERY1 | CANCER DIAGNOSIS                | 0.0                                     |
| 13. ARTHDXY1 | ARTHRITIS DIAGNOSIS             | 0.0                                     |
| 14. ASTHDXY1 | ASTHMA DIAGNOSIS                | 0.0                                     |
| 15. HYSTER3  | HAD A HYSTERECTOMY              | 47.4                                    |
| 16. BMINDX3  | ADULT BODY MASS INDEX           | 3.8                                     |
| 17. ADSTMOK2 | CURRENTLY SMOKE                 | 8.1                                     |
| 18. ADGENH2  | HEALTH IN GENERAL               | 7.2                                     |
| 19. PCS2     | PHYICAL COMPONT SUMMRY          | 7.0                                     |
| 20. MCS2     | MENTAL COMPONT SUMMRY           | 7.0                                     |
| 21. ADINSA2  | DO NOT NEED HEALTH INSURANCE    | 8.5                                     |
| 22. ADINSB2  | HEALTH INSURANCE NOT WORTH COST | 9.0                                     |

|              |                                       |      |
|--------------|---------------------------------------|------|
| 23. ADOVER2  | CAN OVERCOM ILLS WITHOUT MED HELP     | 8.7  |
| 24. LANGHM2  | LANGUAGE SPOKEN MOST IN HOME          | 0.5  |
| 25. PROVTY2  | PROVIDER TYPE                         | 29.9 |
| 26. TYPEPE2  | TYPE OF PROVIDER                      | 67.4 |
| 27. LOCATN2  | LOCATION                              | 30.0 |
| 28. HSPLAP2  | IS PROVIDER HISPANIC OR LATINO        | 68.0 |
| 29. WHITPR2  | IS PROVIDER WHITE                     | 68.2 |
| 30. BLCKPR2  | IS PROVIDER BLACK/AFRICAN AMER        | 68.2 |
| 31. ASIANP2  | IS PROVIDER ASIAN                     | 68.2 |
| 32. NATAMP2  | IS PROVIDER NATIVE AMERICAN           | 68.2 |
| 33. PACISP2  | IS PROVIDER OTH PACIFIC ISLNDR        | 68.2 |
| 34. OTHRCP2  | IS PROVIDER SOME OTHER RACE           | 68.5 |
| 35. GENDRP2  | IS PROVIDER MALE OR FEMALE            | 67.5 |
| 36. RESPCT2  | PROVIDER SHOWS RESPECT FOR TREATMENTS | 39.2 |
| 37. EXPLOP2  | PROVIDER EXPLAINS OPTIONS TO PERSON   | 32.3 |
| 38. LANGPR2  | PROVIDER SPEAKS PERSON'S LANGUAGE     | 95.5 |
| 39. INDCAT2  | INDUSTRY GROUP                        | 92.2 |
| 40. OCCCAT2  | OCCUPATION GROUP                      | 92.2 |
| 41. TTLPY1X  | PERSON'S TOTAL INCOME                 | 0.0  |
| 42. INSCOVY1 | HEALTH INSURANCE COVERAGE INDICATOR   | 0.0  |
| 43. TOTEXPY1 | TOTAL HEALTH CARE EXP                 | 0.0  |

|              |                                    |      |
|--------------|------------------------------------|------|
| 44. OPTOTVY1 | # OUTPATIENT DEPT PROVIDER VISITS  | 0.0  |
| 45. OPDRVY1  | # OUTPATIENT DEPT PHYSICIAN VISITS | 0.0  |
| 46. ERDEXPY1 | TOTAL EMERGENCY ROOM DR EXP        | 0.0  |
| 47. IPDEXPY1 | TOTL HOSP STAZ DR EXP              | 0.0  |
| 48. DVTEXPY1 | TOTAL DENTAL CARE EXP              | 0.0  |
| 49. RXEXPY1  | TOTAL RX EXP                       | 0.0  |
| 50. ADHECR4  | RATING OF HEALTH CARE              | 41.4 |
| 51. EMPST2   | EMPLOYMENT STATUS                  | 0.4  |
| 52. EDRECODE | EDUCATION                          | 2.0  |
| 53. MIDXY1   | HEART ATTACK (MI) DIAG (>17)       | 0.0  |
