# Supplementary material for: Patient-Reported Outcomes and Total Health Care Expenditure in Prediction of Patient Satisfaction: Results From a National Study
Source: PubMed Central journal article supplement (PMC4869209; doi:10.2196/publichealth.4360), 2015-09-23
Supplement: publichealth_v1i2e13_app2.pdf [file publichealth_v1i2e13_app2.pdf]

| Variable ID  | Potential Confounder Name           | Spearman Correlation<br>(P value) | Chi-square<br>(P value) |
|--------------|-------------------------------------|-----------------------------------|-------------------------|
| 1. AGE2X     | Age*                                | .25 (<.001)                       |                         |
| 2. OPTOTVY1  | # Outpatient Dept Provider Visits*  | .14 (<.001)                       |                         |
| 3. OPDRVY1   | # Outpatient Dept Physician Visits* | .09 (<.001)                       |                         |
| 4. BMINDEX3  | Adult Body Mass Index*              | .07 (<.001)                       |                         |
| 5. OPTOTVY1  | # Outpatient Dept Provider Visits*  | .14 (<.001)                       |                         |
| 6. OPDRVY1   | # Outpatient Dept Physician Visits* | .09 (<.001)                       |                         |
| 7. TTLPY1X   | Person's Total Income*              | .08 (<.001)                       |                         |
| 8. INSCOVY1  | Health Insurance Coverage*          |                                   | 278.78<br>(<.001)       |
| 9. CHOLDXY1  | High Cholesterol*                   |                                   | 273.10<br>(<.001)       |
| 10. HIBPDXY1 | High Blood Pressure*                |                                   | 272.52<br>(<.001)       |
| 11. ARTHDXY1 | Arthritis*                          |                                   | 211.76<br>(<.001)       |
| 12. ADINSA2  | Do Not Need Health Insurance*       |                                   | 206.82<br>(<.001)       |
| 13. ADINSB2  | Health Insurance Not Worth Cost*    |                                   | 204.11<br>(<.001)       |
| 14. ADOVER2  | Can Overcome Ills Without Med Help* |                                   | 179.25<br>(<.001)       |
| 15. MARRYY1X | Marital Status*                     |                                   | 162.27<br>(<.001)       |
| 16. LANGHM2  | Language Spoken Most in home*       |                                   | 120.96<br>(<.001)       |
| 17. CANCERY1 | Cancer *                            |                                   | 119.73                  |

|              |                         |  |                   |
|--------------|-------------------------|--|-------------------|
|              |                         |  | (<.001)           |
| 18. SEX      | Gender*                 |  | 105.06<br>(<.001) |
| 19. HYSTER3  | Hysterectomy*           |  | 98.89<br>(<.001)  |
| 20. CHDDXY1  | Coronary Heart Disease* |  | 92.56<br>(<.001)  |
| 21. EMPST2   | Employment Status*      |  | 86.15<br>(<.001)  |
| 22. RESPCT2  | Provider Shows Respect* |  | 75.58<br>(<.001)  |
| 23. RACETHNX | Ethnicity*              |  | 68.69<br>(<.001)  |
| 24. PROVTY2  | Provider type*          |  | 55.39<br>(<.001)  |
| 25. MIDXY1   | Heart Attack*           |  | 41.10<br>(<.001)  |
| 26. ANGIDXY1 | Angina*                 |  | 35.92<br>(<.001)  |
| 27. RACEX    | Race*                   |  | 32.90<br>(<.001)  |
| 28. EDRECODE | Education*              |  | 34.27<br>(0.005)  |
| 29. ADSMOK2  | Currently Smoke*        |  | 29.73<br>(<.001)  |
| 30. TYPEPE2  | Type of Provider        |  | 27.87<br>(.180)   |
| 31. EMPHDXY1 | Emphysema*              |  | 23.25<br>(<.001)  |
| 32. OCCCAT2  | Occupation Group*       |  | 22.07<br>(.009)   |

|              |                                   |  |                  |
|--------------|-----------------------------------|--|------------------|
| 33. EXPLOP2  | Provider Explains Options*        |  | 21.08<br>(<.001) |
| 34. INDCAT2  | Industry Group                    |  | 20.20<br>(.124)  |
| 35. LOCATN2  | Location of Provider*             |  | 18.88<br>(<.001) |
| 36. STRKDXY1 | Stroke*                           |  | 15.31<br>(<.001) |
| 37. ASTHDXY1 | Asthma*                           |  | 9.39<br>(.002)   |
| 38. HSPLAP2  | Hispanic or Latino Provider*      |  | 8.36<br>(.004)   |
| 39. WHITPR2  | White Provider*                   |  | 7.77<br>(.005)   |
| 40. ASIANP2  | Asian Provider*                   |  | 4.76<br>(.029)   |
| 41. BLCKPR2  | Black Provider                    |  | 2.05<br>(.152)   |
| 42. GENDRP2  | Provider Gender                   |  | 1.33<br>(.248)   |
| 43. OTHRCP2  | Provider is Some Other Race       |  | 1.08<br>(.298)   |
| 44. LANGPR2  | Provider Speaks Person's Language |  | 0.18<br>(.673)   |
| 45. PACISP2  | Pacific Islander Provider         |  | 0.17<br>(.685)   |
| 46. NATAMP2  | Native American Provider          |  | 0.09<br>(.926)   |

\*Significant predictors of patient satisfaction and were the covariates used for prediction of patient satisfaction.
